# Supplementary material
Source: publisher figshare collection journal article supplement (https://rs.figshare.com/ndownloader/files/17176919)
Supplement: Supplementary file 1 [file 17176919]

# Supplementary Information

# for

Paleo-trajectories of forest savannization in the southern Congo

by

Julie C. Aleman1,2, Olivier Blarquez2, Hilaire Elenga3,4, Jordan Paillard2, Victor Kimpuni3, Gaubin Itoua4, Gauthier Issele4, and A. Carla Staver1

# SI1: Material and Methods

## Study site

Lake Ngofouo (3°47’44” S, 14° 48' 17" E, 410 m a.s.l) is situated in a forest-savanna mosaic on podzols in the Pool region of the Republic of Congo (Figure 1). The lake is surrounded by a mosaic of forest and *Hypparhenia diplandra* savanna [1] (Figure 1). The main tree species within the savanna matrix are *Xylopia staudii*, *Eriocoelum microcarpa*, *Monopetalanthus microphyllus*, *Pentaclethra eetveldeana*, *Hymenocardia acida*, *Bridelia ferruginea, Strychnos pungens*, and the grass cover is dominated by *Hypparhenia diplandra*, *Panicum phragmitoides*, *Andropogon shirensis* and *Loudetia* sp.. The forest patches within the savanna matrix are mainly composed of *Caloncoba welwitschii*, *Markhamia tomentosa*, *Albizia adianthifolia*, *Pentaclethra etveldeana*, *Millettia laurentii* and *Caloncoba welwitschii*. Finally, the swamp forest surrounding the eastern part of the lake (Figure 1) is composed of *Alstonia boonei*, *Eriocoelum microcarpa*, *Trichilia heudelotii*, *Xylopia staudii*, *Xylopia aethiopica*, *Nitragena stipulosa*, *Coelocaryon preussii*, *Symphonia globulifera*, *Strombosia glaucescens* and *Pentaclethra etveldeana*. The climate around the lake is tropical with ~1300 mm annual precipitation, with a 4-month dry season from June to September. The lake is ~3 ha in area, with a depth of 6 m at its deepest point.

## Sampling and sediment dating

Sediments were collected from a raft using coring apparatuses in August 2015. The topmost water-saturated sediments were extracted using a Kajak-Brinkhurst (KB) sampler, while deeper sediments were sampled using a modified Livingstone piston corer. The sequence NGO-A is 2.70 m long and composed of a top core of 35 cm and three longer cores of 1 m, taken with 20 cm overlap between cores.

The surface KB core was dated using radioactive cosmogenic tracer analysis of 210Pb (half-life = 22.3 years; [2]) of seven samples (Table S1). 210Pb activity was inferred from activity of the daughter isotope 210Po by alpha spectrometry after acid digestion and subsequent deposition on an Ag disk. 210Pb activity was then used to calculate sediment ages using the Constant Rate of Supply model (CRS; [3]). Errors from 210Pb dating were assessed using Monte Carlo Bayesian uncertainties calculations, which have been described and implemented within EXCEL by Sanchez-Cabeza et al. [4]. Older cores were radiocarbon dated via accelerator mass spectrometry (AMS) of four sets of macro-remains (Table S1). Radiocarbon ages were calibrated to calendar years using the IntCal13 calibration curve [5] and expressed in years Before Present (BP, with the present defined as 1950 AD by convention). Radiolead and radiocarbon dates were then combined to generate a Bayesian age-depth model using the *BACON* package [6] in R [7]. Overall, the median temporal resolution is ~8 years cm-1 (Figure 1B).

## Organic vs. Carbonate Composition

The organic vs. carbonate composition of carbon in sediments can reflect the local hydrological context [8,9]. At the Ngofouo site, the bedrock is calcareous, such that an increase in [CaCO3-] suggests increased erosion by run-off. Increased erosion might be indicative of increased seasonality (changes in hydrological regime, see e.g. [8,9]) or decreased tree cover (opening of the vegetation [10]), or both. For estimates, the organic and carbonate composition of sediments were estimated via loss on ignition. Subsamples of 1 cm3 were taken continuously every centimeter, then subjected to a series of 4-hour burns in a furnace at 550°C and 1-hour at 1000°C [11].

## Fire Regimes

Fire regimes can be characterized in the paleorecord via a number of metrics estimated based on charcoal deposits in sediments, including charcoal accumulation rates (CHAR), which is linked to overall rates of biomass burning [12,13], as well as evaluations of charcoal geometry (width to length ratio [W:L] and its standard deviation), which are related to the fuel type of the fires [10]. For estimates, contiguous subsamples of 1 cm3 were soaked ~24 hours in 5% sodium metahexaphosphtate to deflocculate the sediments. Bleach was then used to whiten organic matter and facilitate charcoal particles identification. Charcoal particles were sieved in a 150-m mesh and analyzed under a stereomicroscope coupled to a digital camera and an image analysis software (Clemex vision 7.0) to calculate area, length, width and sphericity of each particle. CHAR was then calculated by resampling original charcoal concentrations using a constant time frame of 8 years (median time resolution) that was then multiplied by sediment accumulation rates based on the age-depth model. W:L and its standard deviation were estimated on the same charcoal samples, on a minimum of 4 particles per sample.

## Phytoliths extraction, identification and counting

Phytoliths are used in paleoecology particularly for how well they differentiate among grass taxa, which are impossible to differentiate on the basis of pollen. Here, phytoliths were described according to their three dimensional shape and classified following the international code of phytolith nomenclature [14] and based on the classification schemes of Twiss et al. [15] and Twiss [16], augmented by information presented by various studies in Africa and elsewhere [17–30]. We identified and classified morphotypes and counted all phytoliths into four categories:

1. Grass silica short cells (GSSC) are produced by Poaceae. Among GSSCs, we identified bilobates, polylobates and crosses morphotypes, which are mainly produced by the Panicoideae subfamily and are C4 grasses adapted to warm and humid climate [15,23]. We also identified saddles, occurring principally in the Chloridoideae subfamily, and are C4 grasses adapted to warm and dry climate [15,23]. Finally, we also identified the rondel type (conical unilobate [22]), a morphotype mainly produced by the Pooideae subfamily [15,23] but also other ones [30];
2. the woody dicotyledon category is composed of globular granulate [24,31], globular decorated [21,22,28], blocky faceted [21,22,25,28] and blocky granulate [22,25] morphotypes;
3. two family-specific morphotypes were identified here. One papillae type produced by Cyperaceae in wetland [20], and the globular echinate morphotype produced by palms (Arecaceae) [28];
4. non-diagnostic morphotypes: elongated, globular smooth and blocky smooth types.

Total influx rates and influx ratios can be informative about vegetation structure. Higher overall influx is often indicative of grassier vegetation types, since grasses are more productive than other vegetation of phytoliths [17,24]. Counts can also be further abstracted into an index of tree cover known as the D:P index, or the ratio of woody dicotyledon (D, globular granulate and decorated morphotypes) to Poaceae (P, GSSCs) phytoliths [22,31,32], recently modified by Bremond et al. [33] to be computed as D:(D+P).

To facilitate identification, phytoliths were extracted from 1 to 6 cm3 of sediments on 16 samples (see Figure 2, Table S2) via a protocol based on Aleman et al. [34]. The main steps are as follows: (1) deflocculation of the sediment with NaPO3, (2) dissolution of carbonates using HCl, (3) oxidation of the organic matter using a mix of potassium chlorate and nitric acid (see [35,36]), (4) reduction and removal of iron oxides, (5) removal of clay by gravity, (6) drying of the residue with ethanol, and (7) densimetric separation of phytoliths in a dense solution of polytungstate (*d* = 2.35). Lycopodium tablets were then added to the phytoliths solution to determine phytolith influx (Table S2). The recovered fraction was mounted on microscope slides using glycerin for 3D observation, and phytoliths were counted at 500X magnification. Only phytoliths with diameters larger than 5 m were counted and classified.

## Human presence around the lake

Past human presence and activities around Lake Ngofouo were compiled from dated archeological records from Oslisly et al. [37] and Morin-Rivat et al. [38]. The combined dataset consists of radiocarbon dates from archaeological sites covering the 5000-100 BP period, subsampled for the 2000-100 BP period to coincide with charcoal and phytolith time series. Regional human occupancy was estimated within a 175-km radius and local human occupancy within a 75-km radius (see Figure 1A). These subsetted data were then used to estimate a proxy of population density (see [39] for more detail). First, we calibrated each date using the IntCal calibration curve [5]. Then, for each archeological dating, we randomly picked one age according to its calibrated probability density. We then used a kernel density function to assess the temporal density of archeological dating. We repeated this procedure 1000 times to assess the 95% confidence interval (CI) around the median trend in archeological sites dating (Figure 2G and Figure S6).

## Statistical analyses

All analyses were performed in R version 3.5.1 [7]. We resampled charcoal data using the *paleofire* package [40]. We performed a wavelet transform of the CHAR using the *biwavelet* package in order to analyze periodicities in the CHAR record. Areas of high power (*p* < 0.05), i.e. time periods with CHAR showing a significant periodicity, were tested using Chi-2 tests. We used the approach developed by Seddon et al. [41], and based on the Sequential T‑test Analysis of Regime-Shifts algorithm (STARS [42]) to detect regime shifts in the continuous records of charcoal, carbonates and organic matters. We sorted each temporal series into 20-year bins standardized by the mean and standard deviation, which were then white-noise filtered using the ordinary least-squares method [41]. The *p* value was set to 0.05 and the window size to 18.

**Supplementary references**

1. Schwartz D, Dechamps R, Elenga H, Lanfranchi R, Mariotti A, Vincens A. 1995 Les savanes du Congo: une végétation spécifique de l’Holocène supérieur. *Publ. occas.* **CIFG/31**, 99–108.

2. Appleby P, Oldfieldz F. 1992 Application of lead-210 to sedimentation studies. In *Uranium Series Disequilibrium, Application to Earth, Marine and Environmental Sciences*, pp. 731–778. Clarendon Press, Oxford.

3. Appleby PG, Oldfieldz F. 1983 The assessment of 210Pb data from sites with varying sediment accumulation rates. *Hydrobiologia* **103**, 29–35.

4. Sanchez-Cabeza J-A, Ruiz-Fernández AC, Ontiveros-Cuadras JF, Pérez Bernal LH, Olid C. 2014 Monte Carlo uncertainty calculation of 210Pb chronologies and accumulation rates of sediments and peat bogs. *Quat. Geochronol.* **23**, 80–93. (doi:10.1016/J.QUAGEO.2014.06.002)

5. Reimer PJ *et al.* 2013 IntCal13 and Marine13 radiocarbon age calibration curves 0-50,000 years cal BP.

6. Blaauw M, Christen JA. 2011 Flexible paleoclimate age-depth models using an autoregressive gamma process. *Bayesian Anal.* **6**, 457–474. (doi:10.1214/11-BA618)

7. R Core Team. 2018 R: A language and environment for statistical computing.

8. Brown KJ, Clark JS, Grimm EC, Donovan JJ, Mueller PG, Hansen BCS, Stefanova I. 2005 Fire cycles in North American interior grasslands and their relation to prairie drought. *Proc. Natl. Acad. Sci. U. S. A.* **102**, 8865–8870.

9. Colombaroli D, Ssemmanda I, Gelorini V, Verschuren D. 2014 Contrasting long‐term records of biomass burning in wet and dry savannas of equatorial East Africa. *Glob. Chang. Biol.* **20**, 2903–2914. (doi:10.1111/gcb.12583)

10. Aleman JC *et al.* 2013 Tracking land-cover changes with sedimentary charcoal in the Afrotropics. *The Holocene* **23**, 1853–1862.

11. Chambers FM, Beilman DW, Yu Z. 2011 Methods for determining peat humification and for quantifying peat bulk density, organic matter and carbon content for palaeostudies of climate and peatland carbon dynamics. **7**.

12. Power MJ *et al.* 2008 Changes in fire regimes since the Last Glacial Maximum: an assessment based on a global synthesis and analysis of charcoal data. *Clim. Dyn.* **30**, 887–907.

13. Duffin KI, Gillson L, Willis KJ. 2008 Testing the sensitivity of charcoal as an indicator of fire events in savanna environments: quantitative predictions of fire proximity, area and intensity. *The Holocene* **18**, 279–291.

14. Madella M, Alexandre A, Ball T. 2005 International code for phytolith nomenclature 1.0. *Ann. Bot.* **96**, 253–260.

15. Twiss PC, Suess E, Smith RM. 1969 Morphological classification of grass phytoliths. *Soil Sci. Soc. Am. J.* **33**, 109–115.

16. Twiss PC. 1992 Predicted world distribution of C3 and C4 grass phytoliths. In *Phytolith Systematic emerging issues. Advance Archaeological Museum Science* (ed P Press),

17. Piperno DR. 2006 *Phytoliths: a comprehensive guide for archaeologists and paleoecologists*. Altamira Pr.

18. Mulholland SC. 1989 Phytolith shape frequencies in North Dakota grasses: a comparison to general patterns. *J. Archaeol. Sci.* **16**, 489–511.

19. Garnier A, Neumann K, Eichhorn B, Lespez L. 2013 Phytolith taphonomy in the middle-to late-Holocene fluvial sediments of Ounjougou (Mali, West Africa). *The Holocene* **23**, 416–431.

20. Novello A, Barboni D, Berti-Equille L, Mazur JC, Poilecot P, Vignaud P. 2012 Phytolith signal of aquatic plants and soils in Chad, Central Africa. *Rev. Palaeobot. Palynol.* **178**, 43–58.

21. Neumann K, Fahmy A, Lespez L, Ballouche A, Huysecom E. 2009 The Early Holocene palaeoenvironment of Ounjougou (Mali): Phytoliths in a multiproxy context. *Palaeogeogr. Palaeoclimatol. Palaeoecol.* **276**, 87–106.

22. Aleman JC, Canal-Subitani S, Favier C, Bremond L. 2014 Influence of the local environment on lacustrine sedimentary phytolith records. *Palaeogeogr. Palaeoclimatol. Palaeoecol.* **414**, 273–283.

23. Fredlund GG, Tieszen LT. 1994 Modern Phytolith Assemblages from the North-American Great-Plains. *J. Biogeogr.* **21**, 321–335.

24. Alexandre A, Meunier JD, Lézine AM, Vincens A, Schwartz D. 1997 Phytoliths: indicators of grassland dynamics during the late Holocene in intertropical Africa. *Palaeogeogr. Palaeoclimatol. Palaeoecol.* **136**, 213–229.

25. Mercader J, Bennett T, Esselmont C, Simpson S, Walde D. 2009 Phytoliths in woody plants from the Miombo woodlands of Mozambique. *Ann. Bot.* **104**, 91–113.

26. Mercader J, Runge F, Vrydaghs L, Doutrelepont H, Ewango CEN, Juan-Tresseras J. 2000 Phytoliths from archaeological sites in the tropical forest of Ituri, Democratic Republic of Congo. *Quat. Res.* **54**, 102–112.

27. Albert RM, Bamford MK, Cabanes D. 2006 Taphonomy of phytoliths and macroplants in different soils from Olduvai Gorge (Tanzania) and the application to Plio-Pleistocene palaeoanthropological samples. *Quat. Int.* **148**, 78–94.

28. Runge F. 1999 The opal phytolith inventory of soils in central Africa--quantities, shapes, classification, and spectra. *Rev. Palaeobot. Palynol.* **107**, 23–53.

29. Bremond L, Alexandre A, Wooller MJ, Hély C, Williamson D, Schäfer PA, Majule A, Guiot J. 2008 Phytolith indices as proxies of grass subfamilies on East African tropical mountains. *Glob. Planet. Change* **61**, 209–224.

30. Barboni D, Bremond L. 2009 Phytoliths of East African grasses: An assessment of their environmental and taxonomic significance based on floristic data. *Rev. Palaeobot. Palynol.* **158**, 29–41.

31. Bremond L, Alexandre A, Hely C, Guiot J. 2005 A phytolith index as a proxy of tree cover density in tropical areas: Calibration with Leaf Area Index along a forest-savanna transect in southeastern Cameroon. *Glob. Planet. Change* **45**, 277–293. (doi:DOI 10.1016/j.gloplacha.2004.09.002)

32. Aleman J *et al.* 2012 Reconstructing savanna tree cover from pollen, phytoliths and stable carbon isotopes. *J. Veg. Sci.* **23**, 187–197.

33. Bremond L, Bodin SC, Bentaleb I, Favier C, Canal S. 2017 Past tree cover of the Congo Basin recovered by phytoliths and δ 13 C along soil profiles. *Quat. Int.* **434**, 91–101.

34. Aleman JC, Saint-jean A, Leys B, Carcaillet C, Favier C, Bremond L. 2013 Estimating phytolith in fl ux in lake sediments. **80**, 341–347. (doi:10.1016/j.yqres.2013.05.008)

35. Strömberg CAE. 2004 Using phytolith assemblages to reconstruct the origin and spread of grass-dominated habitats in the great plains of North America during the late Eocene to early Miocene. *Palaeogeogr. Palaeoclimatol. Palaeoecol.* **207**, 239–275.

36. Strömberg CAE, Dunn RE, Crifò C, Harris EB. 2018 Phytoliths in paleoecology: analytical considerations, current use, and future directions. In *Methods in Paleoecology*, pp. 235–287. Springer.

37. Oslisly R, White L, Bentaleb I, Favier C, Fontugne M, Gillet J-F, Sebag D. 2013 Climatic and cultural changes in the west Congo Basin forests over the past 5000 years. *Philos. Trans. R. Soc. B Biol. Sci.* **368**.

38. Morin-Rivat J *et al.* 2014 New evidence of Human activities during the Holocene in the Lowland Forests of the Northern Congo Basin. *Radiocarbon* **56**, 209–220.

39. Blarquez O, Talbot J, Paillard J, Lapointe-Elmrabti L, Pelletier N, St-Pierre CG. 2018 Late Holocene influence of societies on the fire regime in southern Qu ebec temperate forests. *Quat. Sci. Rev.* **180**, 63–74. (doi:10.1016/j.quascirev.2017.11.022)

40. Blarquez O, Vannière B, Marlon JR, Daniau A-L, Power MJ, Brewer S, Bartlein PJ. 2014 paleofire: an R package to analyse sedimentary charcoal records from the Global Charcoal Database to reconstruct past biomass burning. *Comput. Geosci.* **72**, 255–261.

41. Seddon AWR, Froyd CA, Witkowski A, Willis KJ. 2014 A quantitative framework for analysis of regime shifts in a Galápagos coastal lagoon. *Ecology* **95**, 3046–3055.

42. Rodionov SN. 2004 A sequential algorithm for testing climate regime shifts. *Geophys. Res. Lett.* **31**, n/a-n/a. (doi:10.1029/2004GL019448)

43. Seddon AWR, Froyd CA, Witkowski A, Willis KJ. 2014 A quantitative framework for analysis of regime shifts in a Galápagos coastal lagoon. *Ecology* **95**, 3046–3055. (doi:10.1890/13-1974.1)

# Supplementary Figures

**Figure S1.** Phytoliths diagrams of the total assemblage organized by group, Poaceae phytoliths (GSSC), woody dicotyledons, family specific and non-specific morphotypes. The percentages were computed for the total assemblage.


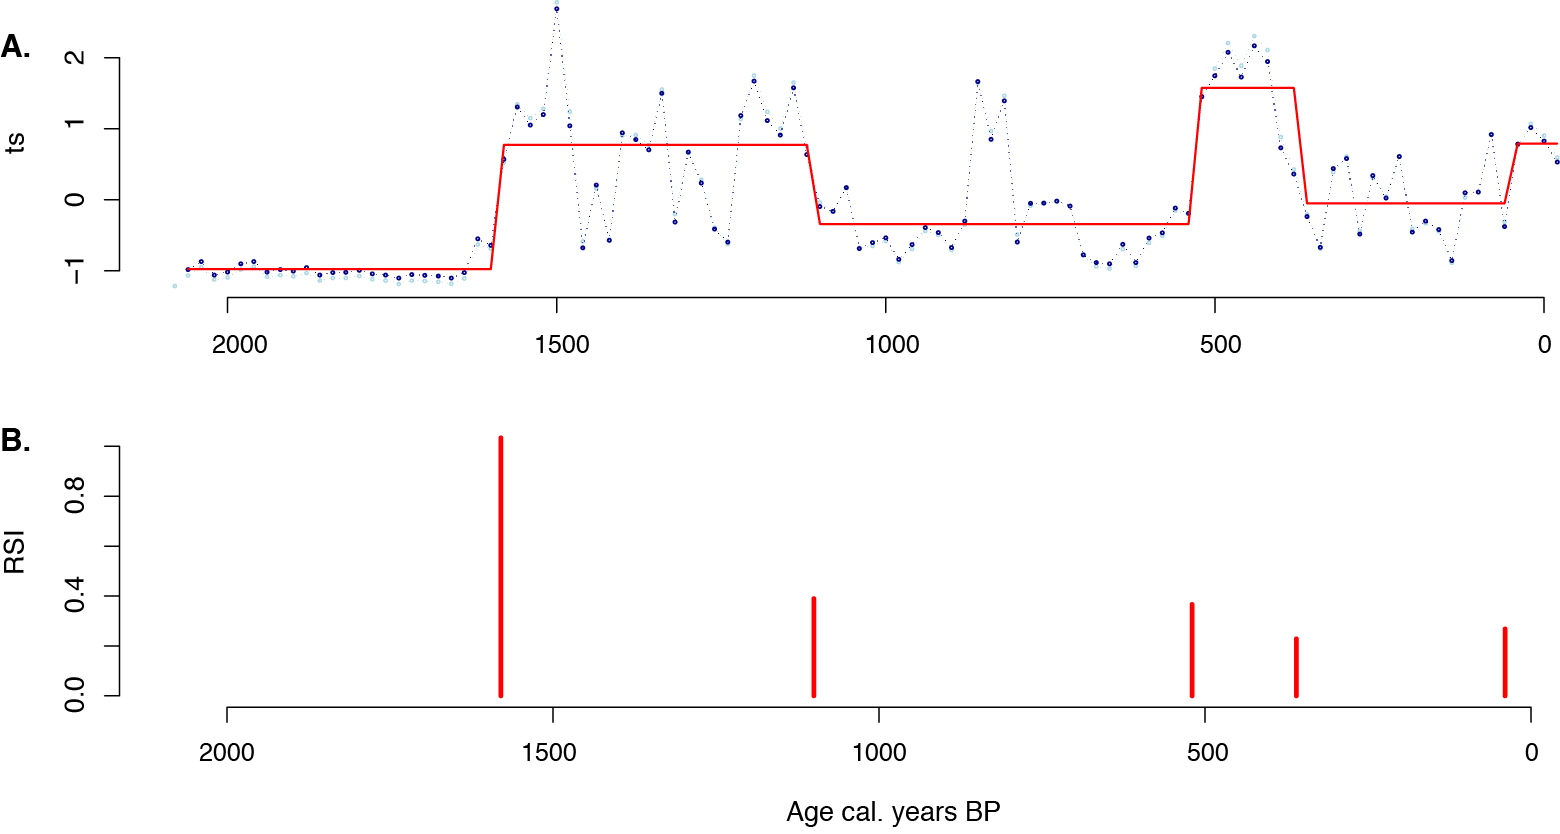


**Figure S2**. Regime shift analysis of charcoal accumulation rates based on the STAR algorithm (see Methods, [43]). Panel A represents standardized CHAR data to z-score from which the regime shift analysis is performed (dotted lines). In panel B are represented the dates and amplitude of the shift based on the regime shift index (RSI, [42]). The dates of shifts (change points) are here 1540, 1060, 480, 340 and 0 BP.


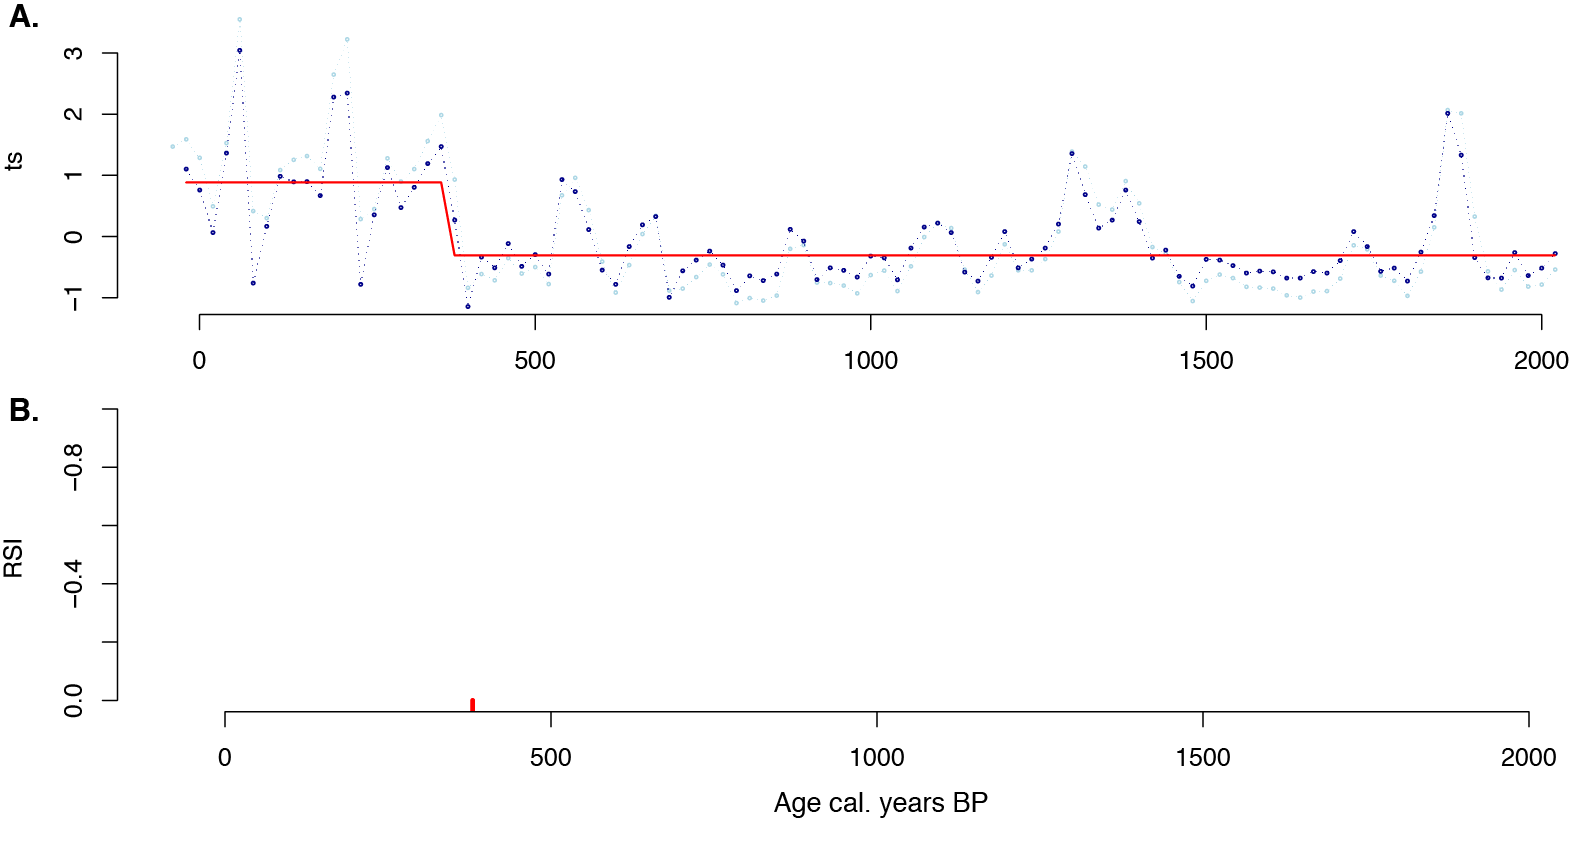


**Figure S3**. Regime shift analysis of the standard deviation of W/L based on the STAR algorithm (see Methods, [43]). Panel A represents standardized standard deviation of W/L to z-score from which the regime shift analysis is performed (dotted lines). In panel B are represented the dates and amplitude of the shift based on the regime shift index (RSI, [42]). The date of the shift is here 1580 BP.


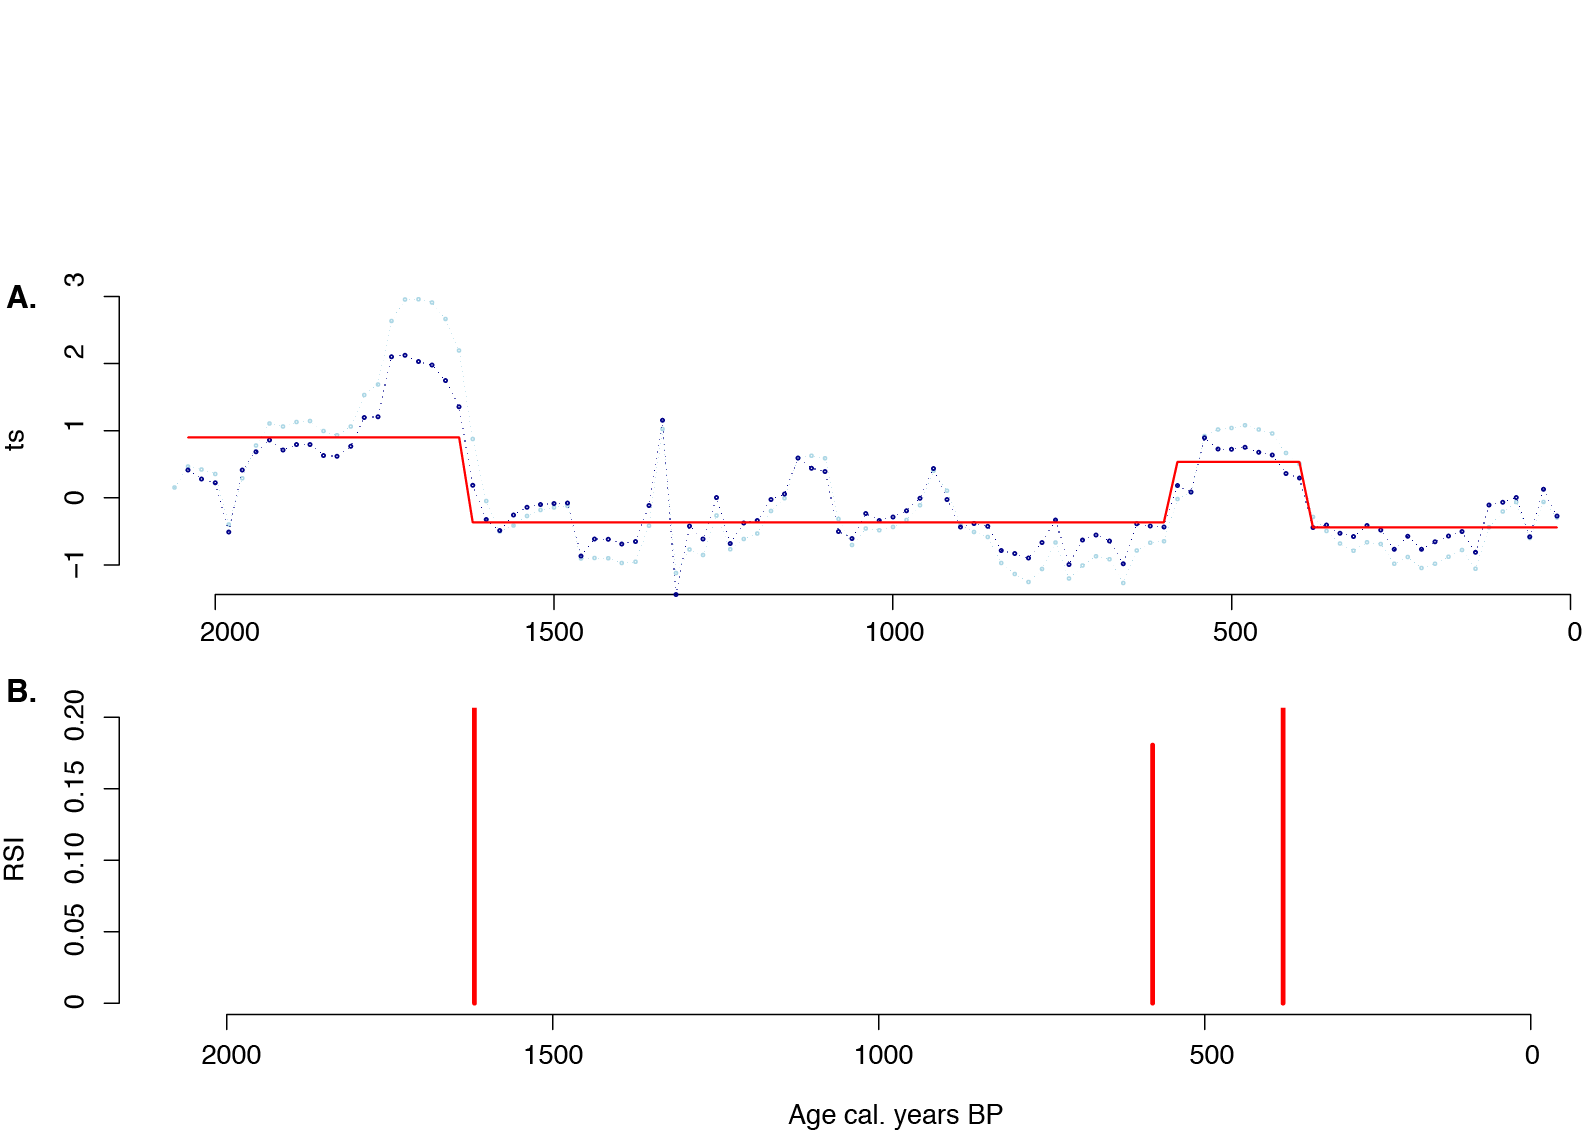


**Figure S4**. Regime shift analysis of sedimentary organic matter percent based on the STAR algorithm (see Methods, [43]). Panel A represents standardized organic matter percent to z-score from which the regime shift analysis is performed (blue dotted lines, corrected to autocorrelation: light blue). In panel B are represented the dates and amplitude of the shift based on the regime shift index (RSI, [42]). The dates of the shifts are 1580, 540 and 340 BP.


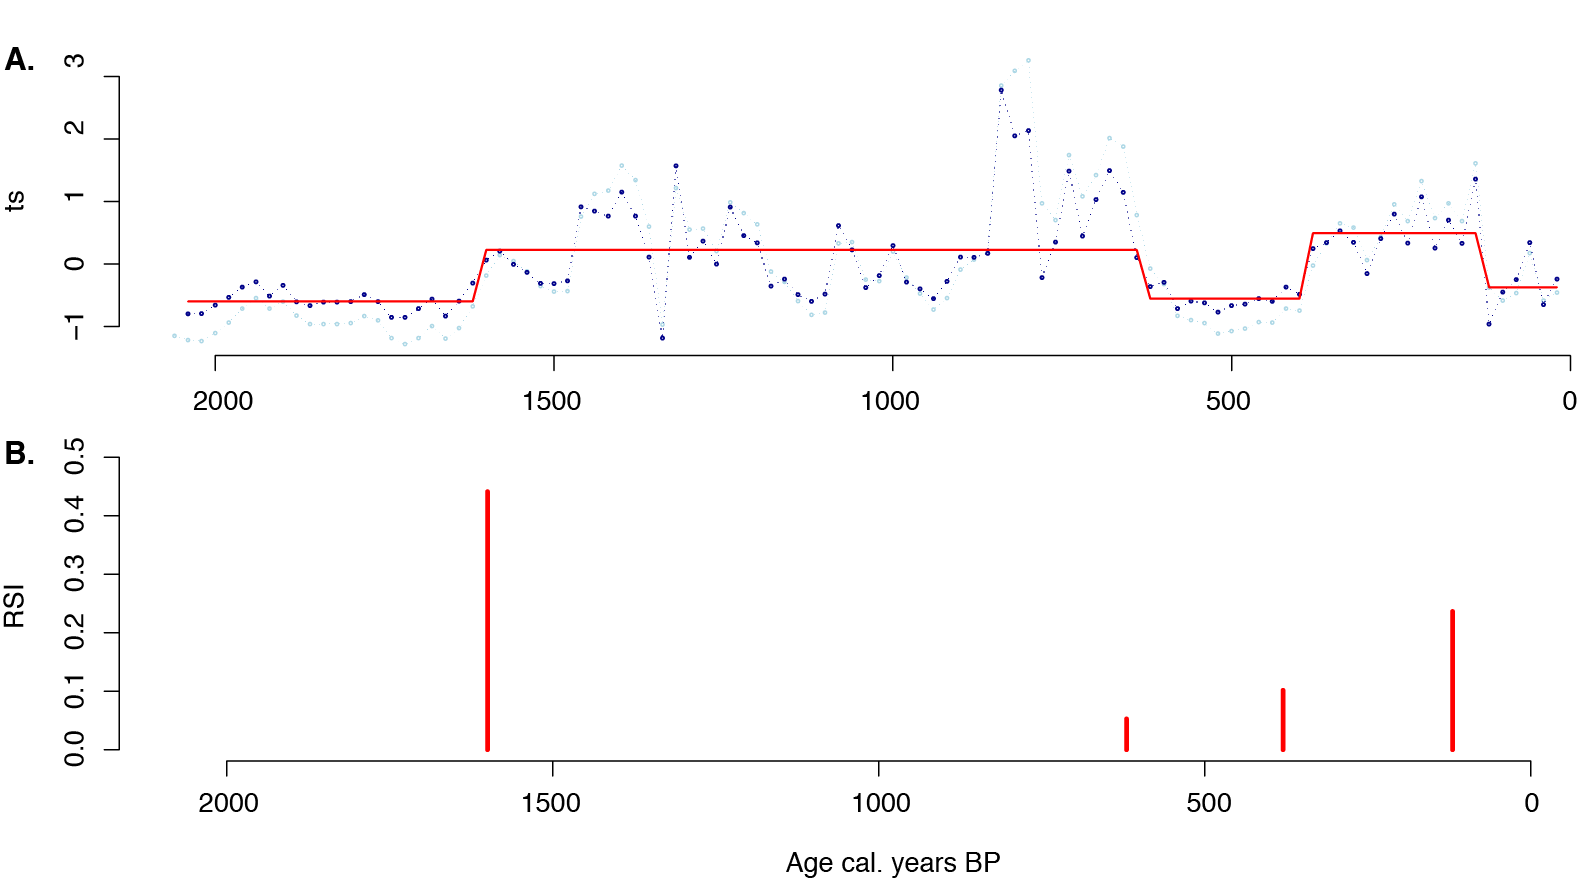


**Figure S5**. Regime shift analysis of carbonates concentration in the sediments based on the STAR algorithm (see Methods, [43]). Panel A represents standardized carbonates concentration to z-score from which the regime shift analysis is performed (blue dotted lines, corrected to autocorrelation: light blue). In panel B are represented the dates and amplitude of the shift based on the regime shift index (RSI, [42]). The dates of shifts are 1560, 580, 340 and 80 BP.


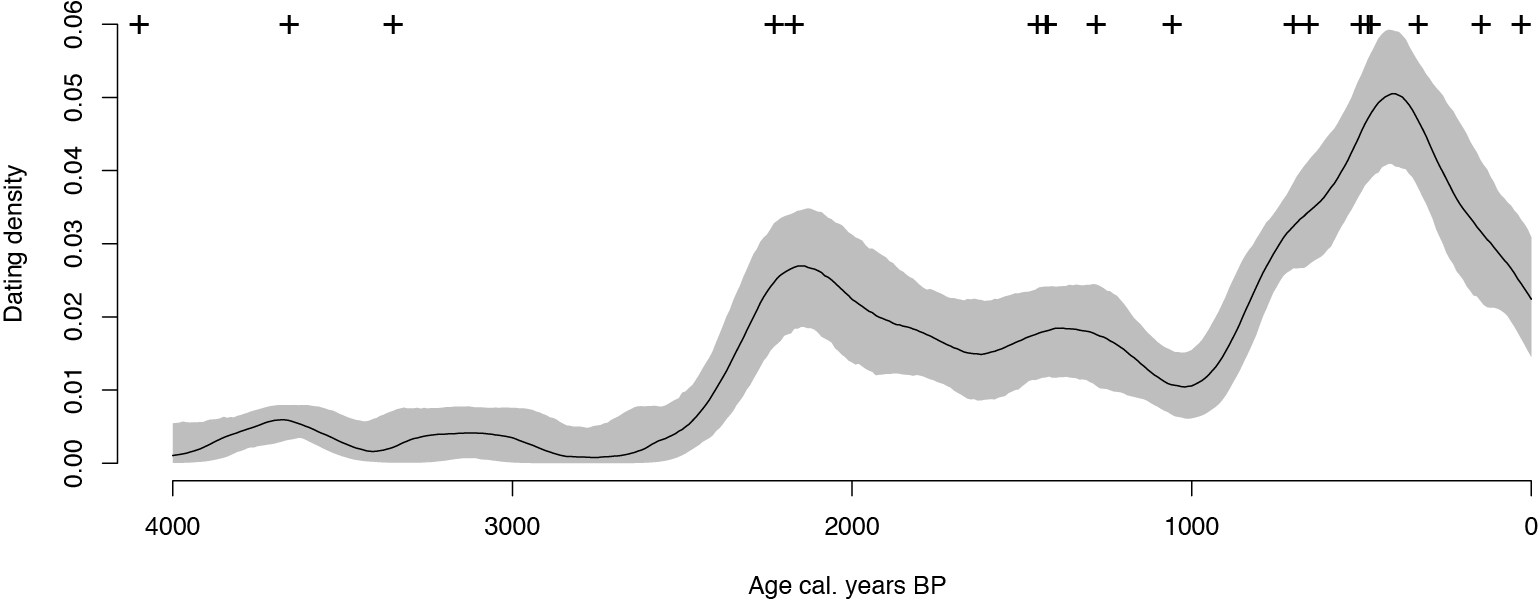


**Figure S6.** Human population density estimated as the archeological dating density (see Methods) since 4000 BP. Black crosses represent local archeological dating and the black line the regional human density associated with 95% confidence interval in lighter grey.

**Table S1.** Radiolead and radiocarbon dating information. 14C ages are uncalibrated; 210Pb ages are calibrated using the CRS model and given in years BP. All dated sediment layers had a thickness of 1 cm.

| Laboratory code | Age 14C | Age BP | Error | Depth (cm) |
| --- | --- | --- | --- | --- |
| Pb-01 | - | -65 | 1 | 582 |
| Pb-02 | - | -61 | 43 | 584 |
| Pb-03 | - | -56 | 47 | 586 |
| Pb-04 | - | -39 | 67 | 589 |
| Pb-05 | - | -26 | 95 | 592 |
| Pb-06 | - | -11 | 96 | 596 |
| Pb-07 | - | 14 | 33 | 601 |
| CAMS#175834 | 890 | - | 40 | 620 |
| D-AMS 028893 | 1236 | - | 24 | 730 |
| D-AMS 028894 | 1669 | - | 24 | 785 |
| CAMS#175472 | 1960 | - | 30 | 840 |

**Table S2.** Phytolith samples, information and counts.

| Sample | Depth (cm) | Age (cal. yr BP) | Volume (cm3) | Globular granulate | Globular decorated | Blocky Faceted | Blocky granulate | Lobate | Cross | Saddle | Rondel | Globular echinate | Papillae | Globular smooth | Blocky smooth |
| --- | --- | --- | --- | --- | --- | --- | --- | --- | --- | --- | --- | --- | --- | --- | --- |
| NGO-KB1 | 585 | -51 | 2.5 | 60 | 6 | 0 | 4 | 124.5 | 21 | 9 | 4 | 13 | 0 | 2 | 1 |
| NGO-KB2 | 595 | 4 | 2.5 | 137 | 22 | 3 | 19 | 81 | 9 | 6 | 1 | 28 | 3 | 7 | 2 |
| NGO-KB3 | 605 | 74 | 2.5 | 132 | 10 | 3 | 9 | 81 | 13 | 7 | 9 | 35 | 5 | 8 | 3 |
| NGO1 | 614 | 163 | 1 | 133 | 11 | 1 | 14 | 31 | 3 | 2 | 2 | 10 | 3 | 4 | 2 |
| NGO2 | 635 | 364 | 1 | 133 | 8 | 4 | 23 | 100.5 | 11 | 4 | 5 | 16 | 1 | 6 | 3 |
| NGO3 | 654 | 525 | 3 | 127 | 27 | 1 | 3 | 79 | 8 | 1 | 8 | 7 | 1 | 9 | 0 |
| NGO4 | 675 | 705 | 1 | 171 | 19 | 3 | 21 | 95.5 | 5 | 7 | 11 | 37 | 0 | 5 | 0 |
| NGO5 | 695 | 870 | 1 | 129 | 9 | 2 | 9 | 75 | 5 | 0 | 7 | 50 | 1 | 5 | 0 |
| NGO6 | 715 | 1037 | 1 | 91 | 29 | 2 | 12 | 67.5 | 8 | 0 | 2 | 35 | 1 | 4 | 2 |
| NGO13 | 724 | 1109 | 1 | 109 | 33 | 2 | 23 | 92 | 8 | 8 | 3 | 15 | 3 | 3 | 0 |
| NGO7 | 735 | 1201 | 1 | 148 | 17 | 2 | 6 | 16 | 2 | 1 | 4 | 6 | 0 | 5 | 0 |
| NGO8 | 755 | 1348 | 1 | 102 | 17 | 0 | 65 | 21 | 7 | 14 | 10 | 45 | 1 | 27 | 0 |
| NGO9 | 774 | 1490 | 4 | 142 | 15 | 2 | 28 | 42 | 17 | 5 | 1 | 28 | 1 | 2 | 0 |
| NGO10 | 795 | 1636 | 6 | 136 | 12 | 1 | 7 | 6.5 | 1 | 0 | 1 | 35 | 0 | 0 | 1 |
| NGO11 | 814 | 1764 | 6 | 74 | 26 | 8 | 30 | 33.5 | 1 | 11 | 7 | 1 | 6 | 22 | 24 |
| NGO12 | 834 | 1901 | 6 | 68 | 12 | 6 | 40 | 28.5 | 5 | 8 | 2 | 1 | 3 | 16 | 8 |

**Table S1-continued.**

| Sample | Elongated | Acicular | Lycopodium | Lycopodium concentration |
| --- | --- | --- | --- | --- |
| NGO-KB1 | 3 | 0 | 19 | 45865 |
| NGO-KB2 | 7 | 0 | 12 | 45865 |
| NGO-KB3 | 5 | 2 | 8 | 20848 |
| NGO1 | 1 | 0 | 18 | 45865 |
| NGO2 | 12 | 2 | 83 | 45865 |
| NGO3 | 2 | 3 | 77 | 104240 |
| NGO4 | 5 | 0 | 9 | 20848 |
| NGO5 | 4 | 3 | 21 | 62544 |
| NGO6 | 1 | 5 | 42 | 45865 |
| NGO13 | 1 | 0 | 23 | 20848 |
| NGO7 | 0 | 0 | 11 | 20848 |
| NGO8 | 0 | 6 | 57 | 45865 |
| NGO9 | 1 | 1 | 11 | 20848 |
| NGO10 | 2 | 0 | 11 | 20848 |
| NGO11 | 31 | 13 | 84 | 20848 |
| NGO12 | 7 | 8 | 58 | 20848 |
